# Supplementary figures and images for: Collagen I Exacerbates Palmitate-Induced Cell Death in HepG2 Cells via Integrin-Mediated Death
Source: Preprints.org preprint supplement (doi:10.20944/preprints202408.0953.v1), 2024-08-14

A

32 hrs. total culture period

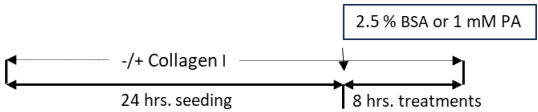

48 hrs. total culture period

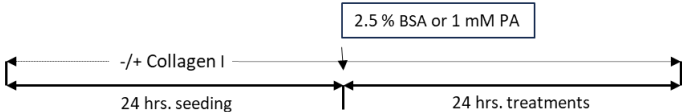

B

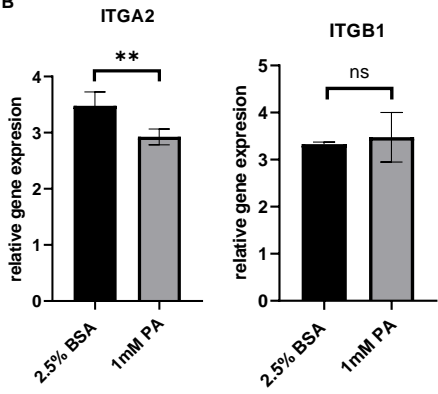

C

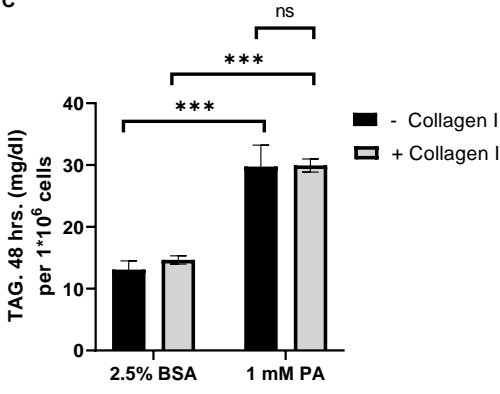

Supplement: Supplementary file 1 [file supplementary]
